# Supplementary material for: Real-world experience of switching from tenofovir disoproxil fumarate to tenofovir alafenamide in patients with chronic hepatitis B: a retrospective study
Source: PeerJ. 2021 Nov 19;9:e12527. doi: 10.7717/peerj.12527 (PMC8607928; doi:10.7717/peerj.12527)
Supplement: Supplemental Information 1 [file peerj-09-12527-s001.xlsx]

## Sheet: Sheet1
TB_Age	Gender	Cirrhosis-Yes(1)-No(0)	LC	LC_Ultrasound / CT / MRI	HCC-Yes(1)-No(0)	Malignancy-Yes(1)-No(0)	Years on TDF	TB_Body-weight-kg	TB_BMI	T0_Body-weight-kg	T0_BMI	T1_Body-weight-kg	T1_BMI	TB_HBV viral load -IU/mL	T0_HBV viral load -IU/mL	T1_HBV viral load -IU/mL	TB_HBeAg interpretation	T0_HBeAg interpretation	T1_HBeAg interpretation	TB_GPT (ALT)	T0_GPT (ALT)	T1_GPT (ALT)	TB_Estimated GFR	T0_Estimated GFR	T1_Estimated GFR	TB_CKD-EPI_eGRE	T0_CKD-EPI_eGRE	T1_CKD-EPI_eGRE	TB_Bilirubin-T	T0_Bilirubin-T	T1_Bilirubin-T	TB_Platelet count	T0_Platelet count	T1_Platelet count	TB_FIB4	T0_FIB4	T1_FIB4
64	F	1	1	U	0	0	4.11773	65	25.3906	62.1	25.0023	64.2	26.0457	141406	Not detected	Not detected	Nonreactive	Nonreactive	Nonreactive	45	20	17	124.61	87.53	84.36	102.28	89.69	87.58		0.51		121	149		3.54814	2.79584
56	M	1	1	U	0	0	1.40452	70	26.3465	69	26.9531	69	26.9531	65844837	23	16	Reactive	Nonreactive	Nonreactive	384	47	36		96.84	102.23		97.47	98.11	1.56	1	1		99	103		4.01644	2.86408
63	M	1	1	CT	0	0	2.30801	64	24.3865	60	22.8624	63	25.2363	1511469	Not detected	Not detected				35	27	9	116.19	100.21	67.89	101.03	94.72	68.79	0.86	0.3	0.4	179	151	176	3.03406	1.49117	3.25
50	M	1	1	U	1	0	7.32923	75	25.9516	65	22.3596	60	20.6397	90316	<10	Not detected		Nonreactive		61	19	16	106.94	86.18	96.5	105.81	92.49	96.11	0.97	1.5	1.7	43	41	39	18.4611	15.5779	15.5064
64	M	0	0		0	0	2.10267	62	23.0518	76.5	24.529	78.3	25.3064	3579747	Not detected	<10	Nonreactive	Nonreactive	Nonreactive	78	23	18	78.86	75.63	89.91	82.76	77.88	88.9	1.11	1.09		145	160		2.34889	2.70678
69	M	0	0		0	0	1.02669	56	20.6946	56	20.3468	56.5	20.5037	448421	<10	10	Nonreactive	Nonreactive	Nonreactive	104	24	17	92.41	86.75		89.78	86.83					146			4.54157
51	M	0	0		0	0	1.18275	97	31.6735	102.2	33.3714	106	35.4172	208459	25	19	Nonreactive	Nonreactive	Nonreactive	130	59	83	110.24	109.36	117.97	106.21	104.73	106.24	0.64			192		220	1.72397		1.13157
70	M	1	1	CT	0	0	1.41273	55	19.0311	70				3267354	<10	14	Nonreactive	Nonreactive	Nonreactive	30	21	17	59.29	54.91	61.28	58.86	53.44	59.77	0.66	1.2	1.3	149	71		4.37443	6.86003
74	M	0	0		0	0	1.67283	78	27.6361	78	27.6361	83.7	29.1675	269295	Not detected	<10	Nonreactive	Nonreactive	Nonreactive	165	29	16	67.74	62.62	63.92	67.07	60.94	61.48	1.07	1.33		201			11.4071
57	F	0	0		0	0	3.49897	50	20.3625	50	20.5721	51.6	21.2304	838521796	27	<10	Reactive	Reactive	Reactive	182	16	12	97.75	100.39	97.86	99.57	97.84	95.96	0.84			345			0.771544
78	M	1	1	U	0	0	3.84942	69	24.4473	68		67.4		25330	Not detected	Not detected	Nonreactive	Nonreactive	Nonreactive	25	34	15	87.18	91.23	95.06	83.46	82.19	82.31	0.52			83	90	98	4.88675	4.74479	4.42627
53	F	1	1	U	0	0	6.22861	50	20.5457	52	21.8409	54.9	23.6686	5623	<10	51	Nonreactive	Nonreactive	Nonreactive	37	26	15	142.1	123.86	120.7	113.57	105.25	103.12		2.29		41	56		8.92566	7.64503
57	F	0	0		0	0	1.25394	61	23.3586	62.6	23.8531	61.5	23.7554	6126908	10	18	Reactive	Reactive	Reactive	60	25	21	70.14	92.31		76.02	96.69		0.69	1.12		205			1.25636
52	F	0	0		0	0	1.24846	67	26.2046	60.5	23.6624	56.4	22.4786	110424421	35	27	Reactive	Reactive	Reactive	143	25	26	139.7	149.58	125.67	113.57	114.44	107.49	0.53	0.53	0.6	194	194	167	1.90525	1.44742	0.968837
66	M	1	1	CT	0	0	5.29227	83	27.6045	65.3	23.7831	62.7	23.1705	2500	Not detected	Not detected		Nonreactive		30	47	27	93.28	94.21	79.11	91.69	89.42	79.83	0.52	1.27	1.2	48	58	45	9.5395	13.9276	14.7802
79	M	1	1	U	0	0	1.78782	72	27.0993	67	25.2174	73.8	27.7767	14471	18	<10	Nonreactive	Nonreactive	Nonreactive	30	27	25	69.84	81.19	75.18	68.02	79.82	72.42	0.56	1.2	0.8	98	113		5.29838	3.86263
61	M	0	0		1	0	3.06366	74	27.6819	74.6	27.9064	72.5	27.1208	4705	Not detected	Not detected	Nonreactive	Nonreactive	Nonreactive	65	54	21	86.67	77.76	72.36	91.86	81.73	74.64	0.48	0.7		192	157		1.81272	1.39723
42	M	0	0		0	0	1.44285	85	25.9455	88.1	27.0709	85.8	26.57	1349814	Not detected	<10	Nonreactive	Nonreactive	Nonreactive	112	40	33		73		80.09	79.53
58	F	0	0		0	0	2.19576	55	22.6003	54	22.361	54.7	22.6218	2084807	Not detected	Not detected	Nonreactive	Nonreactive	Nonreactive	112	17	111	78.16	93.29		85.89	95.82				0.5	178			2.43235
62	M	0	0		0	0	1.91376	62	24.2188	62	24.2188	63	24.6094	102009	<10	Not detected	Nonreactive	Nonreactive	Nonreactive	85	22	17	82.33	82.83	75.87	87.44	86.82	77.88
36	M	0	0		0	0	1.24846	62	22.7732	60	21.9056			284658100	119	25	Reactive	Reactive	Reactive	131	88	213	113.94	90.81		116.13	102.08					322			1.01588
54	F	1	1	U	0	0	1.21287	65	25.3906	62	24.2188	65.7	26.3512	453704	<10	17	Nonreactive	Nonreactive	Nonreactive	35	40	22	93.33	86.88	92.64	100.15	96.86	97.37	1.26			74			6.29069
30	M	0	0		0	0	1.22108	70	24.2215	68.8	24.1745	69.7	24.146	> 1000000000	14	23	Reactive	Reactive	Reactive	188	15	12	70.9	78.08	75.98	77.96	86.93	83.75	0.39	1.01		138		163	1.50621		1.46109
60	M	0	0		0	0	1.92471	59	21.1553	58	21.2524	59	21.2825	9487450	Not detected	Not detected	Nonreactive	Nonreactive	Nonreactive	115	24	22	95.84	78.42	81.06	96.11	82.24	84.44	1			148	165		2.07923	1.6367
59	M	1	1	U	0	0	7.00068	77	26.0276	74.5	27.3646	73.2	24.7431	208874	Not detected	<10	Nonreactive	Nonreactive	Nonreactive	38	37	28	88.64	68.41	82.06	94.02	69.61	84.41	1.23			207	274		1.71077	1.48739
46	F	1	1	U	0	0	5.68104	55.5	22.6024	52.5	21.299	55	22.6003	2838	Not detected	Not detected	Nonreactive	Nonreactive	Nonreactive	61	26	21	182.32	150.16	123.35	127.03	115.24	107.56	0.8			99	102	74	3.03409	3.46472	4.93644
40	F	1	1	U	0	0	7.82752	64	23.7954	70	25.9628			428426	<10	Not detected	Nonreactive	Nonreactive	Nonreactive	20	17	19	83.03	74.41	84.73	95.84	82.95	95.03						191			1.26119
66	F	0	0		0	0	1.14716	64.4	25.7971	65.3	26.6615	67.9	27.7231	262764	Not detected	Not detected	Nonreactive	Nonreactive	Nonreactive	188	25	20	81.55	68.57	69.54	87.06	71.46	71.58	0.86			233	259	288	2.91292	1.57529	1.60717
51	M	1	1	U	0	0	5.44011	68	24.0643	68	24.0643			8267343	Not detected	Not detected	Reactive	Reactive		31	18	18	76.14	79.12		82.8	84.65		0.69	0.56		168			1.19951
33	M	1	1	U	0	0	4.16975	78	23.7563	77	23.4517	72.2	22.0141	4117265	Not detected	Not detected	Reactive	Nonreactive	Reactive	65	22	17	117.08	99.29	92.57	119.23	110.25	104.21	1.02	0.57		192	160	141	1.19383	1.08466	1.37265
53	F	1	1	U	0	0	6.46954	65	23.8751	59.3	22.0479	58.3	21.4141	482321	Not detected	Not detected	Nonreactive	Nonreactive	Nonreactive	20	16	14	93.68	66.87	74.24	100.85	71.64	80	0.71			130	130	180	2.09674	2.60962	1.95992
46	M	0	0		0	0	1.02943	85	27.4406	86	27.7634	84	27.1178	1438570	28	Not detected	Nonreactive	Nonreactive	Nonreactive	87	29	14	79.53	71.01	77.08	87.96	76.79	83.39						183			1.5028
62	M	1	1	U	1	0	5.95483	63	21.7993	60	20.7612	63	21.5451	1832	<10	Not detected	Nonreactive	Nonreactive	Nonreactive	52	50	18	131.45	96.13	115.62	106.31	91.15	96.08	1.28	1.1	2.1	67	90	55	32.0815	8.13173	12.2994
67	F	0	0		0	0	1.45106	79	29.1941	77	28.8748	76	28.6751	2423128	26	12	Nonreactive	Nonreactive	Nonreactive	609	28	20	73.89	75.91	87.53	77.97	79.5	88.43	2.23	1.04		84	120	132	22.6248	4.56392	3.91312
58	M	1	1	U	1	0	6.31075	56	21.3382					10438	Not detected	Not detected	Nonreactive	Nonreactive	Nonreactive	28	13	9	91.34	65.54		95.59	67.06		0.85	0.6		123	148		2.94075	2.87844
50	F	0	0		0	0	1.65366	56.2	20.5431	55	20.1531	56	20.5444	267686	Not detected	Not detected	Nonreactive	Nonreactive	Nonreactive	45	28	30	90.43	88.57	88.22	101.5	100.32	98.92	0.69			167	211	187	1.69602	1.41602	1.57385
42	F	1	1	U	0	0	7.01711	85	36.3108	78	34.6667	77.7	34.3499	1556685	Not detected	Not detected	Nonreactive	Nonreactive	Nonreactive	31	51	32	243.96	110.49	147.48	141.22	107.47	115.2		0.68		163			2.1751
60	M	1	1	U	0	0	6.12183	78	24.0741	76	23.4568	75	23.1481	49300	Not detected	Not detected		Nonreactive		21	12	15		134.8	142.58		104.04	104.77
61	F	0	0		0	0	1.18001	57	21.9899	57	21.9899	58	22.3757	295949	Not detected	Not detected	Nonreactive	Nonreactive	Nonreactive	168	23	18	83.69	80.78		91.82	87.35		0.66
54	M	1	1	CT	1	0	7.6386	52	19.8141	58	22.1003	50	19.052	5807505	16	1064	Nonreactive	Nonreactive	Nonreactive	102	28	130	99.3	91.64	100.86	100.76	93.38	95.39					179			2.68376
55	M	1	1	U	0	0	3.89049	74	27.5134	68	24.8564	68	24.8564	40999	Not detected	Not detected	Nonreactive	Nonreactive	Nonreactive	44	25	12	106.48	92.26	97.2	102.71	94.71	95.25	0.99					242			1.4553
61	M	0	0		0	0	1.0486	72.4	27.1498	69	25.9701	69.8	26.2069	294029400	24	Not detected	Nonreactive	Nonreactive	Nonreactive	2423	36	27	94.51	71.57	81.06	94.97	74.24	84.44	2.67	1.49		102			16.596
59	M	0	0		0	0	3.20876	78	24.6181	70	22.0932	76	24.7315	26981	Not detected	Not detected	Nonreactive	Nonreactive	Nonreactive	33	27	26	85.57	78.68	85.5	91.84	82.82	89.94				246	192		1.50301	2.23723
63	M	1	1	U	0	0	4.08214	86.4	29.0023	82.6	28.4473	85	29.6205	36073	Not detected	Not detected		Nonreactive		33	23	27	87.47	103.88	98.98	91.42	94.26	91.46	0.73
65	M	1	1	U	0	0	2.39288	53	23.2446	49	21.7778	50.6	22.6699	42605698	<10	10	Nonreactive	Nonreactive	Nonreactive	236	15	14	5.34	3.53	4.65	4.06	2.52	3.4	0.77	1.05		121	82	96	6.22432	4.06821	3.84188
58	F	1	1	U	0	0	2.1848	63	26.9127	64	27.3399	65	27.6225	9602	Not detected	Not detected	Nonreactive	Nonreactive	Nonreactive	73	59	34	98.87	91.35	78.56	99.39	95.34	84.36	0.76		0.9	117	106	108	4.35153	3.82092	3.5443
52	F	0	0		0	0	1.20192	48	20.5318	48	19.9792	50.4	21.8144	16949508	<10	Not detected	Nonreactive	Nonreactive	Nonreactive	220	28	16	101.08	107.04	103.79	103.67	103.91	101.89	0.76	0.93		125	137	154	2.1596	2.16019	2.14286
41	M	0	0		0	0	3.81109	81	24.9169	65	20.2865			> 1000000000	13	Not detected	Reactive	Reactive	Reactive	128	23	25		73.16	69.86		79.72	75.04	0.58	1.29		207	211		1.12044	1.00008
62	F	1	1	CT	0	0	4.13415	64	25.6369	59	23.9361	61	24.7475	124300	<10	Not detected	Nonreactive	Nonreactive	Nonreactive	38	27	15	64.48	59.04	55.47	68.12	60.89	56.19	0.51	0.81
60	F	0	0		0	0	1.42916	64	23.7954	65.9	24.6519	67.1	24.9479	93099502	Not detected	20	Reactive	Reactive	Reactive	121	22	20		92.98			95.15
54	M	1	1	U	0	0	1.85352	70	27.1061	75	29.0422			14475	<10	<10	Nonreactive	Nonreactive	Nonreactive	53	49	43	78.78	66.45		85.33	69.65		0.72	1.3		108	112		2.26645	2.61735
53	M	1	1	pathologic diagnosis	1	0	1.96304	84.6	27.9429	75	24.4898	80	26.1224	3579747	<10	Not detected				43	25	10	39.67	66.27	55.62	39.74	69.84	57.09	0.5	0.9	0.5	102	166	242	3.64501	1.5241	1.244
42	F	0	0		0	0	2.13826	56	20.7197	55	20.7008	56	21.0772	31149660	15	<10	Reactive	Reactive	Reactive	92	26	17	86.07	99.02	89.02	99.47	107.22	100.6				116	137	154	3.13311	1.93253	1.52136
51	F	1	1	U	0	0	3.84668	52	21.3675	51	21.2828	52.9	22.0757	293030	Not detected	Not detected	Nonreactive	Nonreactive	Nonreactive	145	11	9	107.46	93.33	92.64	106.12	99.44	98.06	1.28	0.81		102	136	153	13.661	2.68256	1.95207
60	M	1	1	U	0	0	7.31828	56	20.8209	50	18.4548	55	20.7262	135308190	Not detected	Not detected	Reactive	Nonreactive		196	12	16		78.13	92.13		80.47	89.15	1.22	0.4	0.9	73	184	196	14.9706	2.24037	2.02423
39	M	0	0		0	0	1.48939	88	30.4498	91	31.4879			71929	Not detected	<10	Reactive	Reactive	Reactive	88	32	11	124.84	99	106.53	118.19	107.71	109.41				153	190	197	1.27711	1.52586	1.15707
33	F	0	0		0	0	1.3963	66.5	23.5615	64	23.0584			76636300	Not detected	Not detected	Reactive	Reactive	Reactive	201	46	7	99.65	110.19	90.72	114.93	116.82	104.85	0.98
74	F	1	1	U	0	0	1.28953	62.9	27.0465	60	25.6312	64	27.3399	2132	Not detected	Not detected	Nonreactive	Nonreactive	Nonreactive	25	40	23	84.81	63.65	75.33	86.17	64.03	76.46	0.99			137			2.48467
33	M	0	0		0	0	1.61259	72	23.8909	72	23.8909	72	23.8909	226422033	13	12	Reactive	Reactive	Reactive	107	16	22	108.88	89.13		116.19	100.11		0.94			266	262		0.539701	0.634542
44	M	1	1	U	0	0	5.85352	109	36.0021	104	34.3506	103	34.8161	60199199	11	17	Reactive	Nonreactive		42	27	37	109.75	83.92		110.37	91.91		1.34			167			1.42292
31	F	0	0		0	0	5.70294	68	24.977			69.9	26.1482	61065963	Not detected	Not detected	Reactive	Reactive	Reactive	187	13	8	106.31	89.71	100.23	118.3	104.12	110.5	0.82	0.4	0.4	182		266	1.38259		0.933062
71	F	1	1	U	0	0	3.87953	70	30.2978	64.9	29.3116	67.5	31.3222	1798	Not detected	Not detected	Nonreactive	Nonreactive	Nonreactive	123	46	20	75.02	46.47	64.15	78.4	44.86	63.63	0.98	0.74	0.9	118		123	7.32416		5.45928
58	M	1	1	U	0	0	5.68104	65	20.984	65	20.984	65	20.984	15335	Not detected	Not detected	Nonreactive	Nonreactive	Nonreactive	38	18	16	95.16	74.85	82.83	96.99	77.51	86.21	0.64			169	180		2.1156	2.34655
39	M	1	1	U	0	0	3.88775	78	25.1808	76	25.3056	79	26.3045	12632707	Not detected	Not detected	Negative	Nonreactive	Negative	108	22	20	92.75	77.94	86.12	105.69	85.9	95.19	0.78			130	151		1.52998	1.18037
58	F	1	1	U	0	0	6.73785	57	24.6711	52	23.6122	55	25.1096	51	Not detected	Not detected	Nonreactive	Nonreactive	Nonreactive	64	27	19	91.98	75.23	81.04	97.37	79.84	85.85	0.76			96	97		5.28646	4.3212
37	M	0	0		0	0	1.89733	85	27.7551	90	29.3878	104.6	34.5886	397610462	14	10	Nonreactive	Nonreactive	Nonreactive	100	17	28	119.68	94.44	100.35	117.84	107.21	108.23	1.13	0.85
66	M	1	1	U	0	0	2.81451	64	24.0882	60.8	23.8692	67	26.3032	118523	Not detected	Not detected	Nonreactive	Nonreactive	Nonreactive	36	28	19	80.54	51.67	69.27	83.85	50.5	69.33	1	0.5		228	226		2.2193	1.96174
45	M	1	1	U	0	0	1.12252	93	28.7037	93	29.3194			98086	11	Not detected	Nonreactive	Nonreactive	Nonreactive	50	47	44	76.38	78.09		84.25	85.16		1.11			159	155		1.36085	1.23844
29	F	0	0		0	0	1.67009	58	21.3039	63	23.1405			1129996	Not detected	Not detected	Reactive	Reactive	Nonreactive	152	22	15	114.62	83.02	84.89	121.85	95.64	97.39	0.53			215			1.10499
55	M	1	1	U	0	0	6.89938	53	21.2306	52	21.6441	50	21.0555	14972	Not detected	Not detected	Nonreactive	Nonreactive	Nonreactive	19	18	19	87.61	84.7	93.88	95.81	89.93	92.99	0.69	0.65			189			2.16497
51	M	1	1	U	0	0	2.31075	62.7	21.8237	63.8	22.2591	64.8	22.5546	6320000	25	Not detected	Nonreactive	Nonreactive	Nonreactive	42	94	40	105.36	79.08	100.74	104.51	85.33	99.86	2.15	1.74		155	166	135	7.76793	1.97958	2.19017
52	F	1	1	U	0	0	1.01027	53	20.7031	53	20.7031	53.4	21.0695	32580	<10	12	Nonreactive	Nonreactive	Nonreactive	16	23	21	111.38	113.24	106.22	106.58	105.71	102.46				162		143	1.76543		2.26611
63	M	1	1	U	0	0	1.68378	70	24.8016	74	26.2188	70	24.8016	2287498	<10	Not detected	Nonreactive	Nonreactive	Nonreactive	91	17	19	68.33	62.56	62.37	70.75	63.22	62.34	0.55	0.65	0.5	79	76	212	6.60419	5.89745	1.37758
30	M	1	1	U	1	0	6.6475	75	25.9516	75	25.9821	86.7	30.2486	6387	Not detected	Not detected	Nonreactive	Nonreactive	Nonreactive	29	22	22	126.16	106.31	98.74	124.47	112.97	108.72	0.94	0.71		151	186	208	1.10679	1.18751	1.1685
58	M	1	1	U	0	0	1.73854	70	25.1597	68	24.4996	68.1	24.4475	12922538	<10	Not detected	Nonreactive	Nonreactive	Nonreactive	200	23	16	103.77	73.66	90.71	100.03	77.19	92.29	1.22	0.7		157	162		0.705305	2.35544
45	M	1	1	U	0	0	4.84326	71	25.1559	72.5	25.6874	73	25.9571	3669	<10	18	Nonreactive	Nonreactive	Nonreactive	50	40	36	65.47	72.37	77	70.92	77.89	82.68	2.24			102	154	156	2.68285	2.14686	1.55556
45	M	1	1	U	0	0	6.50787	60	22.0386			67	25.4354	9801	2658	35	Nonreactive	Nonreactive	Nonreactive	26	30	20	101.6	97.68	90.94	106.8	101.17	97.38	0.99				197	206		1.01204	0.978008
42	M	0	0		0	0	1.00753	107	31.9508	103	31.0953	108.3	33.6124	1910	18	Not detected	Nonreactive	Nonreactive	Nonreactive	844	45	48	104.5	117.27	106.07	109.62	112.81	107.68	9.17	1.03		224	292		2.05238	0.898511
57	M	0	0		1	0	2.2204	54.5	21.5036	50.7	20.3092	50.1	19.7427	4873	Not detected	Not detected	Nonreactive	Nonreactive	Nonreactive	90	69	60	65.37	76.14	83.45	68.1	80.85	88.68	0.57	0.8	0.8	176	211	215	1.6045	1.82005	1.62966
63	M	1	1	U	1	0	2.33265	53	21.7784	50.2	21.2499	51	21.5045	2613145	Not detected	Not detected	Nonreactive	Nonreactive	Nonreactive	243	20	20	122.3	97.32	73.83	102.89	93.74	95.98	1.04	0.8	0.7	104		181	6.41192		2.36455
47	F	1	1	U	0	0	6.61465	60	26.6667	56	25.2241	58.3	26.2954	9207765	<10	<10	Nonreactive	Nonreactive	Nonreactive	54	28	41	105.13	94.05	98.85	107.96	100.85	100.98	0.61
43	M	0	0		0	0	1.01848	76	26.2976	73	25.3489	75.2	26.392	5885332	25	14	Nonreactive	Nonreactive	Nonreactive	144	70	37	105.51	75.08	104.54	109.41	82.22	106.38	1.09	1.1		167	158		2.01697	1.59994
57	M	0	0		0	0	1.60438	71.5	25.4845	74	26.2188	74	26.2188	143270	<10	Not detected	Nonreactive	Nonreactive	Nonreactive	1344	18	12	128.9	93.85	101.53	108.69	95.84	97.42	5.85	1.9		165	195		12.1463	1.99682
40	F	0	0		0	0	2.8501	72	28.125	75	29.5178			170000000	19	17	Reactive	Reactive	Reactive	1138	24	28	94.72	91.33	89.43	108.89	105.37	102.02	1.55			263	247	310	2.94857	0.981779	0.740688
58	F	1	1	MRI	0	0	2.85832	54	23.0681	53	22.6705	55	23.526	87942	Not detected	Not detected	Nonreactive	Nonreactive	Nonreactive	74	34	19	115.95	103.62	109.69	104.02	98.23	98.54	1.07	0.7		151			2.63443
36	M	0	0		0	0	4.54483	67	21.7779	67	21.9276	67	22.2318	353228356	<10	<10	High Reactive	Reactive	Reactive	49	32	26	96.03	93.94	91.12	109.49	105.72	100.62	0.7	1.25		258	249	256	0.717608	0.815019	0.900908
47	M	0	0		0	0	1.43463	91	26.3887	75	21.7489			2419575	11	Not detected	Nonreactive	Nonreactive	Nonreactive	113	16	16	100.71	106.69	98.47	105.31	105.99	101.88	2.09			212	232	258	1.14706	1.05603	0.726744
35	F	1	1	U	0	0	5.20192	80	30.4832	80	30.4832	81	30.8642	3780901	<10	Not detected	Reactive	Reactive		31	23	19	113.77	127.76	166.27	118.09	117.93	125.54	0.6	0.6		296	219		0.594639	1.17111
59	M	1	1	U	0	0	5.36345	72	24.2528	80	27.0416	84.9	28.6979	5265474	Not detected	<10	Nonreactive	Nonreactive	Nonreactive	76	40	27		79.82	76.76		83.3	78.91	1.07	0.96	0.5
37	M	1	1	U	1	0	4.0219	85	29.2738	86	29.6182	90	31.8878	199897	<10	18	Reactive	Nonreactive		58	41	42	92.57	72.25	84.88	105.69	79.17	93.98	1.19	0.71	0.7		252			0.728811
61	F	1	1	U	0	0	6.66667	57	25.6745	54.7	25.6967	56.5	26.9843	5849	Not detected	<10	Nonreactive	Nonreactive	Nonreactive	44	31	24	119.88	123.44	112.27	103.12	100.15	96.28
52	M	1	1	U	0	0	5.15264	79	26.7658	76.6	26.7248	77.9	26.3012	48848	Not detected	Not detected	Nonreactive	Nonreactive	Nonreactive	46	40	29	89.76	104.13	108.63	98.3	100.03	100.26	1.36	1.2	1.3
39	M	1	1	U	0	0	5.62081	78	26.9896	63	22.032	62.4	22.4281	318258	Not detected	Not detected	Nonreactive	Nonreactive	Nonreactive	54	25	119	93.94	114.9	103.05	107.21	111.4	105.84	2.84	2.1	4.6	152	373	472	2.68853	0.627346	0.95593
54	M	0	0		0	0	1.18001	65	21.8695	60	20.1872	59.1	20.3539	4615048	Not detected	11	Nonreactive	Nonreactive	Nonreactive	80	20	28		92.33	127.07		96.94	107.24		1.04	0.6	192	175	356	1.63512	1.64575	0.726201
47	M	1	1	U	0	0	7.32649	60	21.5139	62.9	22.5807	62	22.3647	2805107	Not detected	Not detected	Nonreactive	Nonreactive	Nonreactive	76	26	19		123.62	125.31		108.17	107.32	1.05			136			2.49743
38	F	1	1	U	0	1	5.4976	52.3	20.2018	46.5	18.0511	47.8	18.5557	24129	Not detected	Not detected	Nonreactive	Nonreactive	Nonreactive	15	21	15	85.17	88.41	102.66	98.85	101.61	107.57	0.63			298	238	234	0.526795	1.25063	1.29099
56	M	1	1	U	0	0	5.31417	71	27.8387	66.5	27.1514	65.8	27.0728	99362339	Not detected	Not detected	Nonreactive	Nonreactive	Nonreactive	215	31	18	118.61	105.88	116.19	106.12	98.31	100.32	1.52	0.76		189	189		3.21295	1.88538
45	M	1	1	CT	0	0	3.28542	72	23.4298	76	24.8447	75.9	24.6708	453227020	13	Not detected	Nonreactive	Nonreactive	Nonreactive	208	48	35	164.53	109.47	112.42	126.8	107.13	106.8		0.9		90	156		5.37366	1.81347
52	F	1	1	U	0	0	2.00411	62	23.6244	62	23.6244	63	24.8261	870749	<10	12	Nonreactive	Nonreactive	Nonreactive	68	119	56	92.79	92.07	91.72	101.06	99.65	98.26	0.93	0.9	1	154	118		3.23486	5.20188
45	F	0	0		0	1	1.50856	64	24.3865	77.5	29.1693	77.1	29.0188	Not detected	<10	Not detected	Nonreactive	Nonreactive	Nonreactive	17	31	40	55.11	33.49	52.69	59.81	34.14	56.13	0.29	0.4	0.4	363	254	246	0.541195	0.631447	0.802139
59	M	1	1	U	0	0	6.40383	60	23.8231	63	25.0142	65	26.0375	163195	<10	Not detected	Nonreactive	Nonreactive	Nonreactive	55	23	19	64.26	49.23	51.12	66.41	48.37	49.92	0.98			55	55		5.93051	5.50478
51	M	1	1	U	0	0	3.66872	85	31.4879	85	31.4879	81	30.0061	837331	<10	Not detected	Nonreactive	Nonreactive	Nonreactive	95	33	38	137.32	79.08	68.07	114.86	85.33	71.76	1.42	0.79		143			2.04909
53	M	1	1	U	0	0	3.88775	85	29.0688	70	23.939	85.7	29.4803	5368115	Not detected	Not detected	Nonreactive	Nonreactive	Nonreactive	53	29	25	102.6	85.87	81.43	102.52	92.49	86.27	1.6	1.4	2.1	74	55		5.21413	5.28725
33	M	0	0		0	0	2.55168	86	26.8406	80	24.968	88.9	27.964	4548447	Not detected	Not detected	Reactive	Reactive	Reactive	97	22	25	89.13	88.08	99.29	101.53	99.41	109.48	1.15
55	M	1	1	U	0	0	1.87269	75	25.0593	80	27.3909	78.8	26.8542	393219	<10	Not detected	Nonreactive	Nonreactive	Nonreactive	69	87	23	101.83	55.42	68.75	101.09	56.69	71.41	1.45	1.2			93	93		3.81119	3.57165
34	M	0	0		0	0	4.21629	83	26.6132	82	26.2925	79.3	25.4268	3756	Not detected	Not detected	Reactive	Nonreactive		36	20	18	112.96	98.21	100.35	117.16	108.72	108.23	0.91	0.5		259	277	280	0.722008	0.724099	0.77445
58	M	1	1	U	0	0	1.24298	63.8	22.0761	58	20.2116	54.6	19.0493	7713	Not detected	<10	Nonreactive	Nonreactive	Nonreactive	35	38	60	115.83	94.83	91.94	104.02	95.64	93.38	2.56	3.36	5.1	115	91	66	5.88227	8.1289	15.9888
47	M	1	1	MRI	1	0	1.79877	56	22.291	55	21.8929			62434	10	Not detected	Nonreactive	Nonreactive	Nonreactive	78	28	22	117.53	88.55	90.85	111.09	97.83	98.3	0.71	1.1	1	136			1.60434
56	M	1	1	U	0	0	7.27173	74	27.852	73	27.1416	75	29.1146	542677	Not detected	Not detected	Nonreactive	Nonreactive	Nonreactive	62	40	32	95.84	84.15	92	98.36	88.67	91.24	0.92			194	192		1.68635	1.95007
52	M	0	0		0	1	2.3217	68	24.977	66.9	24.5135	65	24.3748	33	Not detected	Not detected	Nonreactive	Nonreactive	Nonreactive	52	27	14	167.55	121.52	161.41	122.6	107.51	117.45	0.72	0.3	0.5	261	205	214	1.6301	1.60062	4.19625
21	F	0	0		0	0	3.68241	44.9	17.9632	47	18.851	55.7	24.2358	29495956	Not detected	14	Reactive	Reactive	Reactive	309	21	10	168.94	122.82	131.9	141.19	126.68	127.79	0.7	0.72		108	113		1.90259	1.25524
39	M	0	0		0	0	2.17659	68.8	24.0603	67.7	23.9867	70	24.9499	195562	Not detected	12	Nonreactive	Nonreactive	Nonreactive	47	37	38	126.21	115.35	132.36	118.88	113.94	118.41
27	M	0	0		0	0	2.46133	59	18.2099	59.7	18.1626	58.5	18.1968	821403	<10	Not detected	Reactive	Reactive	Reactive	1475	24	21	80.92	83.19	88.76	90.04	93.13	100.29	12.26	0.84		174	204	221	2.75552	0.812494	0.710936
46	M	0	0		0	0	1.20192	70	22.3435	75.3	24.2265	75.4	24.4246	161538400	11	Not detected	Nonreactive	Nonreactive	Nonreactive	135	26	23	76.04	68.16	76.22	83.66	73.36	82.35	0.64			105			4.2984
55	F	0	0		0	0	1.51129	66	25.9431	60	23.5847	65	26.0375	34957471	Not detected	Not detected	Nonreactive	Nonreactive	Nonreactive	136	34	11	87.2	79.94	84.85	97.54	87.99	93.12	0.6	0.6	0.6	205	240	233	3.74996	1.34412	1.8013
57	M	1	1	U	0	0	1.36619	73	23.6472	71	22.921	74	24.2463	15187219	<10	<10	Nonreactive	Nonreactive	Nonreactive	2368	34	21	86.98	72.55	69.98	94.48	76.36	72.61	3.26	0.6	0.5		109	116		2.97054	3.49901
50	M	0	0		0	0	1.44559	74	25.6055	69.7	24.3175	72.6	25.5704	142734102	11	25	Reactive	Reactive		190	29	25	90.48	63.83	62.97	99.7	67.52	65.87	10.51	0.6	0.9	112	153	160	4.04842	1.76714	1.39125
62	M	1	1	U	0	0	3.87406	90	27.563	80	25.2493	84.2	26.1035	182040	17	Not detected	Nonreactive	Nonreactive	Nonreactive	51	30	23	74	55.23	63.43	77.62	54.8	63.3	0.85	1.17		124			2.73055
61	F	1	1	U	0	0	6.51061	52	23.1111	45	21.1109			28726047	Not detected	Not detected	Nonreactive	Nonreactive	Nonreactive	55	21	22	83.69	73.67	74.55	91.82	77.43	77.63	0.64				181			2.86938
56	M	1	1	U	0	0	5.44285	77	28.2828	67	26.1719	61.2	21.9441	63003	<10	Not detected	Nonreactive	Nonreactive	Nonreactive	79	7	27	6.54	8.67	7.81	5.23	7.01	6.2	0.82	0.73	0.4	105	142	164	3.8403	2.97048	1.62644
46	M	0	0		0	0	5.97947			72		72		25714928	Not detected	Not detected	Nonreactive	Nonreactive	Nonreactive	23	29	28		97.68	93.02		100.46	97.62	0.55
42	M	0	0		0	0	1.19097	99	34.5808	95	32.872	99	35.1183	19064	<10	25	Nonreactive	Nonreactive	Nonreactive	109	190	63	91.37	79.71	82.12	103.49	88.08	90.26	0.69	0.7		160			1.93601
59	F	1	1	U	0	0	5.35797	60	24.6548	54	23.3419	57	24.6386	254875	Not detected	Not detected	Nonreactive	Nonreactive	Nonreactive	28	39	21	129.26	69.21	67.12	106.64	72.99	69.79	0.86	0.84		97	99		4.48297	4.52079
77	F	1	1	U	0	0	5.13347	48	21.8547	50	22.7653			1620532	159	Not detected	Nonreactive	Nonreactive	Nonreactive	279	7	10	42.74	14.77	12.9	40.82	12.1	10.29	1.33	0.45			108	118		4.64756	3.82689
51	M	1	1	U	0	0	4.8898	82	28.0428	83.6	28.59	82	28.0428	1697701	11	14	Nonreactive	Nonreactive	Nonreactive	702	29	25	87.83	89.58	84.8	97.15	95.35	90.55	16.87	0.8		140	117		4.97717	3.70915
70	M	1	1	CT	1	0	2.77618	60	24.0346	56	22.4323	56.6	22.8749	3795009	Not detected	15				57	31	19	49.29	54.91	57.68	47.88	52.7	55.25	0.85	0.7	0.9	138	133	173	4.83742	4.69675	3.67993
59	M	1	1	U	0	0	1.88912	60	22.5827	67	24.9412	70	26.3465	74950	Not detected	<10	Nonreactive	Nonreactive	Nonreactive	53	76	36	108.26	104.27	108.87	100.96	97.78	98.03	2.01	1	1.6	116	111	126	2.93431	3.45984	3.16667
61	M	1	1	MRI	0	0	1.14716	53	19.9481	55	20.3994			2071	Not detected	<10	Nonreactive	Nonreactive	Nonreactive	34	33	21	69.51	74	72.94	72.61	77.07	75.05	1.22	1	1.1	84	60	76	4.10984	6.9457	5.69664
50	F	0	0		0	1	1.00479	66.5	29.0883	53.4	23.5759	55	24.3146	<10	Not detected	Not detected	Nonreactive	Nonreactive	Nonreactive	12	10	12	88.57	121.62	104.98	101.03	109.16	103.34	0.18	0.3	0.4	493	344	372	0.761212	1.14724	1.76852
46	M	1	1	U	0	0	2.05886	72	23.5102	70	22.8571	71.6	23.3796	11420063	21	Not detected	Reactive	Nonreactive		80	34	31	154.4	104.68	114.2	122.27	105.44	107.4	0.77		0.9	79			8.33289
54	M	0	0		0	0	2.47502	65	22.2031	72	24.7096	71	24.281	738227329	16	<10	Reactive	Reactive	Reactive	441	13	11	98.28	89.58	91.66	100.25	95.35	94.92	1.04	0.6	0.5	189	202		2.69388	1.64351
38	M	0	0		0	1	1.01027	76.7	23.13	68	20.7564	74.3	22.8305	1593	Not detected	Not detected	Nonreactive	Nonreactive	Nonreactive	34	27	35	72.63	123.51	95.92	80.5	117.36	105.95	0.48	0.6	0.5	130	94	153	1.75456	1.55598	1.0871
53	M	1	1	U	0	0	5.94661	63	22.3214	60	41.3216			3475331	Not detected	<10	Reactive	Nonreactive		38	56	31	94.29	77.37	78.02	99.48	81.8	81.73	0.56	0.41			179	186		1.43336	1.41367
40	M	1	1	U	0	0	3.73169	85.7	30.3642	84	29.7619	84	29.7619	11074	Not detected	Not detected	Nonreactive	Nonreactive	Nonreactive	60	41	38	87.2	99.73	138.35	97.96	106.49	118.18	0.97	2.8	5.5	194	60	41	1.83667	9.84936	16.9146
59	M	0	0		1	0	3.154	55	20.8284	59	22.4813			95049481	<10	Not detected				42	38	35	109.97	99.39	99.06	101.53	95.56	94.23	0.45	0.5	0.3	185			1.96841
62	M	1	1	U	0	0	1.05681	51.8	20.3105	55.8	21.9889	57.8	22.7199	19930	<10	15	Nonreactive	Nonreactive	Nonreactive	51	42	31	78.42	58.88	78.86	82.82	59.49	81.6	1.34			72			6.39072
44	M	0	0		1	0	2.72142	80	26.0926	84	27.3973			3803	Not detected	Not detected	Nonreactive	Nonreactive	Nonreactive	30	21	16	91.81	66.08	78.45	102.05	71.42	85.76	0.43	0.2	0.3	202			1.03398
62	M	1	1	U	0	0	2.82272	62	23.3355	57.3	21.4348	58	21.6966	520355	<10	<10	Nonreactive	Nonreactive	Nonreactive	46	36	36	67.12	68.62	66.28	69.6	70.1	66.72	0.99	0.7	0.7	142	175	188	2.18879	2.13714	1.78191
32	M	1	1	U	0	0	6.01506	82	25.8806	72	23.1648	76	24.5351	370539	Not detected	<10	Nonreactive	Nonreactive	Nonreactive	20	21	18	122.57	147.94	125.55	122.05	125.79	117.22	0.84	0.4	0.4	244	223	235	0.703812	1.14491	1.12335
70	M	1	1	CT	1	0	4.71732	57	19.7232	55	19.0311	57.7	20.1785	125350	Not detected	Not detected				21	23	13	78.38	117.66	106.14	80.42	93.91	89.35	0.42	0.85	0.7	150	98		3.86973	5.98309
60	M	0	0		0	0	4.90075	70	23.911	59	20.2957	59	20.5601	2675187	Not detected	Not detected	Reactive	Reactive	Reactive	580	15	15	89.51	25.43	16.47	93.8	23.19	14.12	4.26	0.21		106	118		13.397	3.27125
41	M	0	0		0	0	4.88159	80	26.2724	70	23.3078			4573091	Not detected	<10	Reactive	Reactive	Reactive	1208	33	35	80.49	72.07	76.55	89.95	78.24	82.93	2.13	0.7	0.5	148	207		4.74248	1.2648
46	M	1	1	U	0	0	4.38056	72	26.7698	68	24.7665	68.6	24.985	1769190	Not detected	Not detected	Nonreactive	Nonreactive	Nonreactive	3536	26	27	192.26	100.87		133.3	102.91		15	1	0.7	124	191		12.9948	1.83281
57	M	0	0		0	0	2.27515	50	19.5312					154585	34	17	Reactive	Reactive	Reactive	1277	27	22	98.22	78.29	84.98	98.66	82.88	89.93	13.86	0.8	0.8	161	174		8.44098	1.59269
40	M	0	0		0	0	1.94114	65	21.2245	65	21.3218	65	21.3218	77121521	Not detected	11	Reactive	Reactive	Reactive	429	14	15	107.07	98		111.74	106.21
48	F	1	1	U	0	0	1.69199	57	23.1542	70	28.4349	65	26.9161	136711	<10	Not detected	Reactive	Reactive		23	29	25	77.68	87.14	89.7	87.65	98.5	99.39	1.13	1.6	0.8	75	44	34	6.80591	7.74856	8.87059
65	M	1	1	U	0	0	1.26215	62	22.0458	55	19.5567	61	21.6902	36075	<10	552	Nonreactive	Nonreactive	Nonreactive	62	48	32	67.39	59.43	70.45	68.94	59.48	71.18	0.99	0.8	1.4		134			3.4641
58	F	1	1	CT	1	0	1.25941	56	25.2241	55	25.2117	55.1	25.1552	16033	Not detected	51	Nonreactive	Nonreactive	Nonreactive	31	51	18	89.18	93.29	86.79	96.42	96.5	93.3	0.4	0.4	0.3	216	216	266	1.63973	1.90594	1.13509
45	M	1	1	pathologic diagnosis	1	0	3.40589	76.2	26.0593	78	26.8946	78	26.8946	1093049	Not detected	41				60	28	23		91.23	85.3		100.4	93.17	0.88			151			1.65435
35	M	1	1	U	0	0	2.80356	95	31.0204	90	29.3542	90	29.3542	6047849	Not detected	Not detected	Nonreactive	Nonreactive	Nonreactive	104	39	24	102.58	102.26	102.26	112.89	110.29	108.76	1.02			174			1.10456
65	M	1	1	U	0	0	5.61533	62	21.9671	70	25.3722	65	23.5599	12843	Not detected	21	Nonreactive	Nonreactive	Nonreactive	188	39	24	100.21	61.03	72.82	94.72	60.38	72.76	1.19	0.8	1.1	158	148		2.55033	2.22773
48	M	1	1	U	0	0	2.87201	81	29.0785	77	27.9768	78.2	28.6888	2995936	<10	<10	Nonreactive	Nonreactive	Nonreactive	62	24	29	82.61	81.6	79.38	91.37	88.84	85.33	1.25			160			1.7907
37	F	1	1	U	0	0	1.42094	45	21.1399	48	22.213	50	23.1385	11436	<10	Not detected	Nonreactive	Nonreactive	Nonreactive	30	27	25	121.81	103.85	99.7	119.12	112.41	109.72		0.2		142	168	199	1.99803	1.74236	1.44724
52	M	1	1	U	0	0	6.21492	69	26.6193	70	27.4122			190337	Not detected	17	Nonreactive	Nonreactive	Nonreactive	121	33	24	126.75	110.35	92.26	111.16	101.53	94.04	1.46	0.7		191	214		1.65826	1.29582
49	M	0	0		0	0	2.09993	74	27.1809	74	27.9892	74.5	27.6993	575507	Not detected	Not detected	Reactive	Reactive	Reactive	222	55	43	67.87	73.65	68.15	72.85	79.23	71.94			0.6		171	163		1.76317	2.23134
47	M	0	0		0	0	1.27858	76.5	27.496	74	26.5656	79.2	28.6379	807963	<10	<10	Nonreactive	Nonreactive	Nonreactive	156	40	48	92.83	96.2	81.29	102.29	102.31	88.29	0.6		0.6	197			1.58543
48	M	1	1	U	1	0	1.90007	62	20.2449	67				1007675	38	Not detected				30	30	25	133.48	81.92	95.03	115.78	89.47	99.48	1.97	0.9	0.9	104	99		2.69648	4.51456
37	M	0	0		0	0	3.60575	84	26.5118	83	26.1962	84.6	26.9428	939429006	14	Not detected	Reactive	Reactive	Reactive	677	24	20	123.52	119.61	130.72	119.17	115.21	117.68	0.85			163	163		1.75354	1.02688
40	M	1	1	U	0	0	2.55168			75	23.1481	85	26.0605	11175	Not detected	Not detected	Nonreactive	Nonreactive	Nonreactive	42	44	20	110.81	94.97	107.05	112.91	105.21	108.44	1.16	1.7	2.2	127	142		1.50658	1.32389
35	M	0	0		0	0	1.22108	100	74.3163	98	31.6374			28076813	47	Not detected	Reactive	Reactive	Reactive	141	83	61	106.06	80.38	102.82	114	89.12	110.29	0.59			277		383	0.627814		0.55895
58	M	1	1	U	0	0	4.42984	82	27.3982	85	28.4005	93	31.0735	> 1000000000	Not detected	206	Nonreactive	Nonreactive	Nonreactive	39	3	12	12.54	7.4	5.24	10.77	5.9	3.98	0.78	0.4		75	165	197	7.30611	2.16944	1.20013
51	F	1	1	U	1	0	7.75086	59	21.4109	55	20.8798	55	20.9313	5042229	Not detected	Not detected	Nonreactive	Nonreactive	Nonreactive	56	23	17		84.55	91.67		93.12	95.34	0.54	0.42		171	173		1.15579	2.4178
75	M	1	1	U	1	0	6.36824	78	29.7211	70	26.6728			174263689	Not detected	Not detected	Nonreactive	Nonreactive	Nonreactive	258	11	10	34.31	62.28	63.42	31.33	59.1	59.63	4.59	0.53		209	122	186	9.85244	6.89028	3.3867
49	F	1	1	CT	0	0	2.84463	71	26.079	70.7	25.5336	71	26.079	14892734	Not detected	Not detected	Nonreactive	Nonreactive	Nonreactive	63	22	18	106.25	107.04	118.1	107.03	104.64	106.23	1.12			81		202	4.5729		1.38621
44	M	1	1	U	0	0	3.14579	81.5	27.1369	75.7	25.7676	73.8	25.1209	39213	Not detected	<10	Nonreactive	Nonreactive	Nonreactive	51	38	38	79.71	90.85	85.66	88.08	101.35	94.49	0.98	1.15		137			1.43912
58	M	1	1	U	0	0	4.79671	75	25.9516	56	19.6536	59	20.6575	12523524	Not detected	<10	Nonreactive	Nonreactive	Nonreactive	503	28	42	77.64	70.56	83.88	82.96	72.83	87.43	7.85	1.53		179	179		7.05035	2.09464
62	M	1	1	U	0	0	1.71937	67.1	24.6465	60	22.0386	60	22.0386	80814	Not detected	Not detected	Nonreactive	Nonreactive	Nonreactive	20	41	6	80.33	90.75	72.48	85.07	91.44	74	1.45	0.66		108	138	305	2.95244	1.98612	1.85519
